# Supplementary figures and images for: Therapeutic inhibition of monocyte recruitment prevents checkpoint inhibitor-induced hepatitis
Source: HighWire-hosted journal article supplement (doi:10.1136/jitc-2023-008078), 2024-04-01

Supplementary figure 2

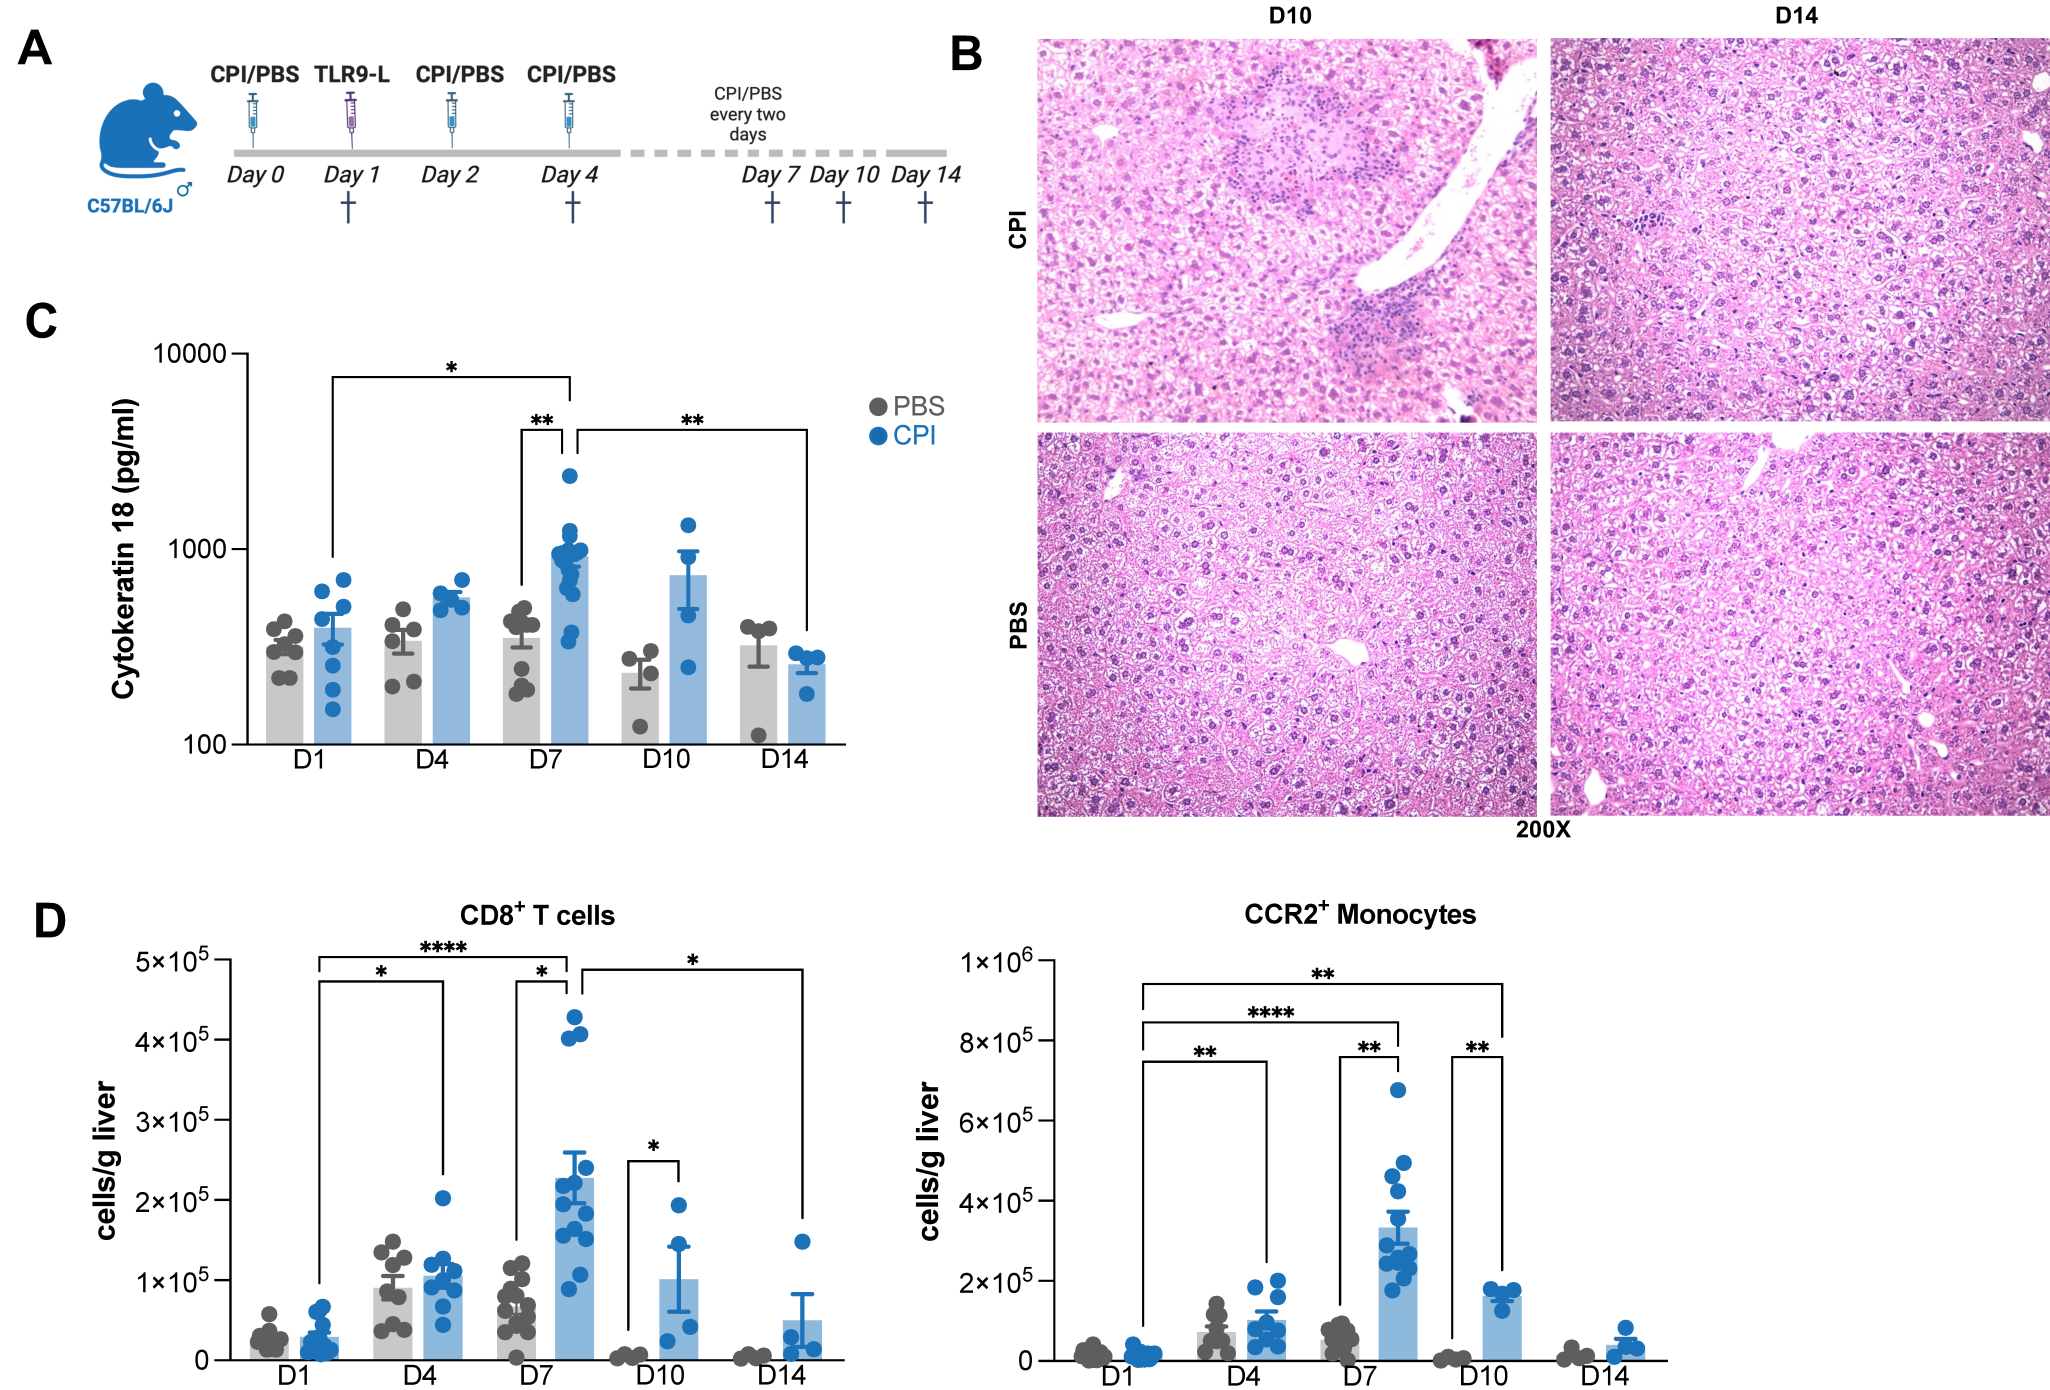

Supplement: jitc-2023-008078supp003_data_supplement.pdf [file jitc-2023-008078supp003_data_supplement.pdf]
